1 **Kaposi's sarcoma-associated herpesvirus fine-tunes the temporal expression of**  
2 **late genes by manipulating a host RNA quality control pathway**

3

4 Julio C. Ruiz<sup>1</sup>, Anne Devlin<sup>1</sup>, Jiwoong Kim<sup>2</sup>, Nicholas K. Conrad<sup>1\*</sup>

5

6 <sup>1</sup>Department of Microbiology, <sup>2</sup>Department of Population and Data Sciences,

7 University of Texas Southwestern Medical Center, Dallas, Texas, USA

8

9 **Running title:** PPD dampens KSHV late gene expression

10

11

12 \*Corresponding author: Nicholas.Conrad@UTSouthwestern.edu

13

14

15

16

17

18

19

20

21

22

23

24 **Abstract**

25

26 Kaposi's sarcoma-associated herpesvirus (KSHV) is a human oncogenic nuclear DNA  
27 virus that expresses its genes using the host cell transcription and RNA processing  
28 machinery. As a result, KSHV transcripts are subject to degradation by at least two host-  
29 mediated nuclear RNA decay pathways, PABPN1 and PAP $\alpha$ / $\gamma$ -mediated RNA decay  
30 (PPD) and an ARS2-dependent decay pathway. Here, we present global analyses of viral  
31 transcript levels to further understand the roles of these decay pathways in KSHV gene  
32 expression. Consistent with our recent report that the KSHV ORF57 protein increases  
33 viral transcript stability by impeding ARS2-dependent decay, ARS2 knockdown has little  
34 effect on viral gene expression 24 hours after lytic reactivation of wild-type virus. In  
35 contrast, inactivation of PPD results in premature accumulation of late transcripts. The  
36 up-regulation of late transcripts does not require the primary late gene-specific viral  
37 transactivation factor, suggesting that cryptic transcription produces the transcripts that  
38 then succumb to PPD. Remarkably, PPD inactivation has no effect on late transcripts at  
39 their proper time of expression. We show that this time-dependent PPD evasion by late  
40 transcripts requires the host factor NRDE2, which has previously been reported to protect  
41 cellular RNAs by sequestering decay factors. From these studies, we conclude that KSHV  
42 uses PPD to fine-tune the temporal expression of its genes by preventing their premature  
43 accumulation.

44

45

46

47 **Importance**

48

49 Kaposi's sarcoma-associated herpesvirus (KSHV) is an oncogenic gammaherpesvirus  
50 that causes Kaposi's sarcoma and other lymphoproliferative disorders. Nuclear  
51 expression of KSHV genes results in exposure to at least two host-mediated nuclear RNA  
52 decay pathways, PABPN1 and PAP $\alpha$ / $\gamma$ -mediated RNA decay (PPD) and an ARS2-  
53 mediated decay pathway. Perhaps unsurprisingly, we previously found that KSHV uses  
54 specific mechanisms to protect its transcripts from ARS2-mediated decay. In contrast,  
55 here we show that PPD is required to dampen the expression of viral late transcripts that  
56 are prematurely transcribed, presumably due to cryptic transcription early in infection. At  
57 the proper time for their expression, KSHV late transcripts evade PPD through the activity  
58 of the host factor NRDE2. We conclude that KSHV fine-tunes the temporal expression of  
59 its genes by modulating PPD activity. Thus, the virus both protects from and exploits the  
60 host nuclear RNA decay machinery for proper expression of its genes.

61

62

63

64

65

66

67

68

69

## 70 **Introduction**

71

72 Kaposi's sarcoma-associated herpesvirus (KSHV; also known as human herpesvirus 8;  
73 HHV-8), is an enveloped, double-stranded DNA virus. It is the etiological agent of  
74 Kaposi's sarcoma and of the lymphoproliferative disorders primary effusion lymphoma  
75 (PEL) and multicentric Castleman's disease (MCD) (1-4). Like other herpesvirus, the  
76 KSHV life cycle consists of a latent phase and a lytic phase. During latency, the viral  
77 genome resides in the host nucleus as a non-integrated, circular episome, and no virions  
78 are produced. Upon reactivation, the virus undergoes a well-regulated cascade of gene  
79 expression initiated by the viral transactivator ORF50 (Rta) that ultimately results in the  
80 production of infectious virus (5-7). KSHV transcription and genome replication occur in  
81 the nucleus where the virus takes control of the host machinery needed for these  
82 processes. Consequently, similar to host RNAs, viral transcripts are subject to host-  
83 mediated RNA quality control (QC) pathways (8-12).

84

85 RNA QC pathways play an essential role during RNA biogenesis (8-12). In addition to  
86 eliminating misprocessed transcripts, RNA QC pathways prevent the accumulation of  
87 unstable, non-coding RNAs such as promoter-upstream transcripts (PROMPTs, also  
88 called uaRNAs) (13-15). PROMPTs are polyadenylated, non-coding RNAs with no or few  
89 introns that are transcribed from bidirectional promoters antisense to protein-coding  
90 genes (16-18). Accumulation of PROMPTs has deleterious effects for the cells as they  
91 compete with coding transcripts for the translational machinery (15). In eukaryotes, at  
92 least two nuclear RNA decay pathways prevent the accumulation of PROMPTs (13-15,

93 19, 20). Primarily, they are degraded through the CBCN complex that is recruited to the  
94 RNA via its 5' cap. CBCN consists of the cap-binding complex (CBC), the ARS2 protein,  
95 and the nuclear exosome targeting (NEXT) complex (13, 21). The NEXT complex subunit  
96 MTR4 recruits the RNA exosome to degrade the transcript (13, 22).

97

98 PROMPTs and other long polyadenylated nuclear RNAs are also degraded by the  
99 PABPN1 and PAP $\alpha$ / $\gamma$ -mediated RNA decay (PPD) pathway in which decay factors are  
100 recruited through 3' poly(A) tail (14, 15, 19, 20, 23, 24). In this pathway, the nuclear poly  
101 (A)-binding protein (PABPN1) promotes poly(A) tail extension of target transcripts by  
102 stimulating the function of the poly (A) polymerases (PAP $\alpha$  or PAP $\gamma$ ; abbreviated  
103 PAP $\alpha$ / $\gamma$ ). The targeted RNAs are subsequently degraded by the nuclear RNA exosome.  
104 Recruitment of the exosome to polyadenylated RNAs is mediated by the zinc finger  
105 protein ZFC3H1, which links the exosome cofactor MTR4 to PABPN1. This link was  
106 coined the poly(A) tail exosome targeting (PAXT) connection (also called the polysome  
107 protector complex, PPC) (15, 20). Overall, both PPD and the CBCN complex survey the  
108 integrity of RNAs to eliminate transcriptional noise, misprocessed and other potentially  
109 detrimental RNAs.

110

111 ARS2 directly interacts with the CBC to form a hub that allows the assembly of mutually  
112 exclusive complexes that dictate the fate of a transcript (13, 21, 24, 25). For instance,  
113 ARS2 interacts with PHAX or ALYREF to promote the nuclear export of properly  
114 processed snRNAs and mRNAs, respectively (21, 24-26). Alternatively, ARS2 recruits  
115 NEXT or PAXT to target RNAs for exosome-mediated degradation (13, 20, 27). In some

116 cases, ARS2 targets transcripts for degradation independently of NEXT or PPD/PAXT  
117 (28, 29). These complex interconnections challenge efforts to uncover the degree of  
118 independence or redundancy between nuclear RNA decay pathways. Nonetheless,  
119 ARS2 clearly plays a central role in promoting the decay of a number of nuclear  
120 transcripts.

121

122 Like their host counterparts, KSHV mRNAs are capped and polyadenylated, but most  
123 KSHV genes are short and intronless (30, 31). Consequently, cellular RNA QC pathways  
124 may degrade KSHV RNAs due to their similarity to PROMPTs. The essential  
125 multifunctional KSHV ORF57 protein promotes viral transcript accumulation by increasing  
126 nuclear RNA stability (32-45). We recently reported that viral transcripts are subject to  
127 degradation by both PPD and an ARS2-dependent but NEXT-independent decay  
128 pathway upon lytic reactivation of virus lacking ORF57 (29). Using pulse-chase assays  
129 with an unstable form of the KSHV nuclear non-coding PAN RNA (PAN $\Delta$ ENE), we further  
130 showed that ORF57 preferentially protects viral transcripts from the ARS2-dependent  
131 decay pathway (29). Interestingly, although viral transcripts succumb to PPD, ORF57  
132 protection of PAN $\Delta$ ENE from PPD was modest, suggesting the possibility that a subset  
133 of viral transcripts undergo PPD-dependent degradation in the presence of ORF57 (29).  
134 However, the role of PPD during viral infection with ORF57 expressing virus has not been  
135 fully explored.

136

137 Here, we used RNAi to inactivate PPD and/or ARS2-dependent decay and monitored  
138 their contributions to KSHV gene expression in the presence of ORF57 by RNA-seq at

139 24 hours after lytic reactivation. ARS2 depletion resulted in few changes in viral gene  
140 expression. However, PPD inactivation resulted in increased expression levels of several  
141 viral genes. Interestingly, the most upregulated transcripts were late transcripts that are  
142 otherwise expressed at ~48 hours after lytic reactivation. Our data suggest that PPD  
143 prevents the premature accumulation of late transcripts which presumably arise as a  
144 consequence of cryptic transcription. Notably, at their proper time of expression, PPD  
145 inactivation has no effect on viral late transcripts, and the host factor NRDE2 is needed  
146 for evasion of PPD. We conclude that KSHV exploits PPD to fine-tune the temporal  
147 expression of viral genes by dampening steady-state levels of prematurely transcribed  
148 late genes.

149

## 150 **Results**

151

### 152 **PPD inactivation results in aberrant temporal expression of KSHV late genes**

153

154 Our previous studies showed that viral RNAs were subject to both PPD and ARS2-  
155 mediated decay in the absence of ORF57 (29). ORF57 more potently protected viral  
156 transcripts from ARS2-mediated decay than from PPD, suggesting that viral transcripts  
157 succumb to PPD even in the presence of ORF57. To further characterize the role of  
158 these decay pathways during KSHV infection, we performed an RNA-seq experiment to  
159 monitor the levels of viral transcripts after siRNA depletion of ARS2, the PPD component  
160 PAP $\alpha$ / $\gamma$ , or both simultaneously (dKD) in iSLK cells latently infected with the KSHV  
161 infectious clone BAC16 (iSLK WT) (46, 47)(Fig 1A). Efficiency of knockdown was

162 validated by western blot, qRT-PCR and/or loss of function assays (Fig 1B). Lytic  
163 reactivation was induced using doxycycline (dox) to promote expression of the dox-  
164 inducible RTA integrated into the iSLK host cell chromosomes and by the histone  
165 deacetylase inhibitor sodium butyrate (NaB). We prepared libraries from RNA harvested  
166 24 hours post induction (hpi), and the samples were subjected to high-throughput  
167 sequencing (Fig 1A). Expression of several KSHV genes significantly increased in  
168 samples depleted of PAP $\alpha$ / $\gamma$  and in the dKD compared to samples treated with a control  
169 siRNA. However, we observed minimal alterations in gene expression in the ARS2  
170 knockdown samples, consistent with the idea that ARS2-mediated decay is inhibited by  
171 ORF57 (Fig 1C and Table S1). Surprisingly, the most upregulated genes (> 4-fold  
172 change) upon PAP $\alpha$ / $\gamma$  depletion and in the dKD were late genes, 76% and 70%  
173 respectively (Fig 1D). Typically, these KSHV late genes are not expressed at ~24 hpi in  
174 these cells. These data suggest that KSHV exploits PAP $\alpha$ / $\gamma$  to temporally control the  
175 expression of late genes.

176

### 177 **PPD/PAXT targets KSHV late genes for degradation**

178

179 Our RNA-seq data show that PAP $\alpha$ / $\gamma$  depletion results in increased expression of late  
180 genes at 24 hpi and suggest that PPD controls the expression late genes that prematurely  
181 arise due to cryptic transcription. To validate these observations and extend the findings  
182 to additional PPD factors, we focused our attention on three KSHV late genes, ORF52,  
183 ORF75, and K8.1. These genes were selected because they have different structural  
184 features. ORF52 is a short transcript (395 base pairs (bp)) while ORF75 is a long



185 transcript (3890 bp). Both ORF52 and ORF75 are intronless, but K8.1 contains one intron.  
186 In spite of these structural differences, the expression of each gene increased upon  
187 PAP $\alpha$ / $\gamma$  depletion at 24 hpi (Fig 2B, D and F). None were affected by ARS2 depletion  
188 alone. Similar results were obtained when the mRNA levels of these genes were  
189 monitored by qRT-PCR (Fig 2C, E and G). In principle, PAP $\alpha$ / $\gamma$  knockdown may affect  
190 gene expression independent of PPD due to its function in 3'-end formation. To confirm  
191 the role of PPD, we tested whether depletion of PPD factors other than PAP $\alpha$ / $\gamma$  caused a  
192 similar phenotype. We depleted cells of the unique PPD/PAXT factor ZFC3H1 or the  
193 exosome co-factor MTR4. Efficiency of knockdown was monitored by western blot, qRT-  
194 PCR and loss of function assays (Fig 2A). Consistent with PPD inactivation, depletion of  
195 ZFC3H1 or MTR4 also increased ORF75, ORF52 and K8.1 levels (Fig 2C, E and G).  
196 These data support the conclusion that PPD/PAXT suppresses KSHV late gene  
197 expression during the early stages of the virus lytic phase.

198

199 **PPD regulates virus late gene expression independently of the viral transactivation**  
200 **factor ORF24**

201

202 To elucidate the mechanism of late gene expression upregulation in the context of PPD  
203 inactivation, we first focused our attention on the requirements for late gene expression.  
204 In KSHV, transcription of late genes takes place after initiation of viral DNA replication,  
205 and their expression requires the action of several viral transactivation factors (vTF) (48-  
206 53). The viral TATA box-binding protein homolog, ORF24, is a KSHV transactivation  
207 factor that plays a critical role when the virus progresses from DNA replication to

208 expression of late genes. ORF24 binds to late gene promoters and recruits RNA  
209 polymerase II (pol II) and other vTFs to the promoter region of late genes to induce their  
210 expression. Because ORF24 mRNA levels were increased in cells depleted of PAP $\alpha$ / $\gamma$   
211 and in the dKD at 24 hours post lytic reactivation (Fig 3A and 3B), it is possible that PPD  
212 inactivation results in ORF24 upregulation which drives the increased expression of late  
213 genes. In this case, the effects of PPD on other late transcripts would result from a  
214 secondary effect of ORF24 upregulation. To determine whether the increased expression  
215 of late genes at 24 hpi is due to an upregulation of ORF24 upon PPD inactivation, we  
216 used iSLK cells transfected with a bacmid encoding the viral genome in which ORF24  
217 contains a point mutation, R328A, that renders it inactive (51). ORF24<sup>R328A</sup> maintains the  
218 interaction with pol II but is unable to interact with other vTAs resulting in strongly impaired  
219 expression of late genes (Fig 3C). If the up-regulation of late genes by PPD inactivation  
220 is due to secondary effects of ORF24 upregulation, then the up-regulation will be  
221 abrogated in the mutant virus. In contrast to this prediction, depletion of PPD components  
222 PAP $\alpha$ / $\gamma$ , MTR4 or ZFC3H1 resulted in increased mRNA levels of ORF52, ORF75 and  
223 K8.1 in ORF24<sup>R328A</sup> reactivated cells (Fig 3D, E and F). Thus, the role of PPD in late gene  
224 expression at 24 hpi is independent of ORF24 transactivation. Moreover, these data are  
225 consistent with a proposed role for PPD in the posttranscriptional inhibition of premature  
226 late transcript accumulation.

227

228 **PPD control of late transcripts is restricted to early phases of reactivation but does**  
229 **not affect genome replication or virus production in iSLK cells**

230

231 KSHV late genes are expressed after the initiation of viral genome replication (48-52),  
232 which occurs prior to 48 hpi in our iSLK WT cells. As PPD inactivation increases late gene  
233 expression at 24 hpi, we tested whether the expression of late genes at 48 and 72 hpi is  
234 also affected by PPD inactivation. Interestingly, at 48- or 72-hpi, PAP $\alpha$ / $\gamma$  depletion had  
235 no effect on the expression levels of the late genes tested (Fig 4A, B and C). These data  
236 suggest that at the proper time of expression, KSHV late transcripts are able to avoid  
237 PPD-mediated degradation. They further support the model that PPD dampens  
238 premature expression of KSHV late genes.

239

240 Because of the aberrant timing of viral late gene expression, we investigated whether  
241 PPD inactivation affected virus fitness. To test genome replication, iSLK WT cells were  
242 depleted of PAP $\alpha$ / $\gamma$  or ZFC3H1, and ORF57 DNA levels were monitored over time by  
243 qRT-PCR. Depletion of PAP $\alpha$ / $\gamma$  or ZFC3H1 had no significant effect on the levels of viral  
244 genome replication at 48 hpi (Fig 4D). We next investigated whether PPD inactivation  
245 affects production of infectious virions. To test this, we collected media from iSLK WT  
246 cells at 0, 8, 12, 24, 48 and 72 hours after lytic reactivation and used it to infect HEK293  
247 cells. Two days later, viral infection was analyzed by flow cytometry to detect the GFP  
248 expressed by BAC16. Most of the HEK293 cells infected with media collected from iSLK  
249 WT cells at 48 and 72 hpi were GFP positive (Fig 4E). Importantly, depletion of PAP $\alpha$ / $\gamma$   
250 or ZFC3H1 had no effect in the production of infectious virus as the percentage of GFP  
251 positive cells was similar to that of cells treated with a control siRNA (Fig 4E). These data  
252 suggest that the premature expression of late genes observed upon PPD inactivation  
253 does not dramatically perturb the virus life cycle in cultured cells.

254

255 **NRDE2 is needed for proper expression of late genes at 48 hours post lytic**  
256 **reactivation**

257

258 To determine how late transcripts avoid degradation at their proper time of expression,  
259 we centered our attention on the human nuclear RNAi-defective 2 (NRDE2) protein.  
260 NRDE2 localizes to nuclear speckles where it forms a 1:1 complex with MTR4 to inhibit  
261 its recruitment and RNA degradation (54). Given this protective activity, we hypothesized  
262 that KSHV uses NRDE2 to protect late transcripts from degradation. Therefore, we  
263 depleted cells of PAP $\alpha$ / $\gamma$ , NRDE2 (Fig 5A) or both simultaneously and measured  
264 expression levels of late transcripts by qRT-PCR at 24 hpi (Fig 5B) or 48 hpi (Fig 5C). As  
265 expected, PAP $\alpha$ / $\gamma$  depletion resulted in increased expression levels of late genes at 24  
266 hpi but no effect at 48 hpi (Fig 5B and C) (green bars). In contrast, NRDE2 depletion  
267 caused a reduction in expression levels of all late transcripts at 48 hpi but had no effect  
268 at 24 hpi (Fig 5B and C) (orange bars) suggesting that NRDE2 protects KSHV late  
269 transcripts from PPD-mediated degradation at 48 hpi. Importantly, co-depletion of PAP $\alpha$ / $\gamma$   
270 and NRDE2 restored late transcripts levels to that of control siRNA treated cells (Fig 5C)  
271 (blue bars). We conclude that after viral genome replication, the host NRDE2 protects  
272 KSHV RNAs from PPD.

273

274

275

276

277 **Discussion**

278

279 KSHV transcripts are subject to degradation by at least two host-mediated nuclear RNA  
280 decay pathways, PPD and an ARS2-dependent decay pathway (29). KSHV ORF57  
281 increases viral transcript stability by protecting RNAs from ARS2-dependent decay (29).  
282 Our work here suggests that KSHV uses PPD to post-transcriptionally control the  
283 premature accumulation of late transcripts during the early stages of the viral lytic phase.  
284 In the context of PPD inactivation, late transcripts aberrantly accumulate at 24 hpi (Fig 1  
285 and 2), but the premature production of late transcripts does not require functional  
286 ORF24. Therefore, the transcripts do not accumulate as a secondary consequence of the  
287 up-regulation of the late gene inducer ORF24 (Fig 3). Presumably, the open chromatin  
288 and high transcription of the viral genome during early lytic phase allows low-level cryptic  
289 transcription of late genes (Fig 6A). The transcripts are eliminated by PPD, so no proteins  
290 are produced. At their proper time of expression, late transcripts evade PPD by an  
291 NRDE2-dependent mechanism (Fig 5). Thus, we propose that KSHV fine-tunes temporal  
292 expression of its genes using a specific host RNA quality control pathway.

293

294 Increasing evidence shows that RNA decay pathways play a critical role in controlling  
295 viral infection (29, 55-57). The nuclear RNA decay factors, MTR4 and ZCCHC7,  
296 translocate to the cytoplasm where they promote exosome-mediated degradation of viral  
297 transcripts of multiple RNA virus (55). In the case of KSHV, the ORF57 protein protects  
298 viral transcript from ARS2-dependent decay by preventing MTR4 recruitment (29). In  
299 these examples, the viruses must circumvent the RNA QC machinery to properly express

300 its genes. Here we propose that the virus hijacks PPD activity to fine-tune the temporal  
301 expression of its genes. That is, KSHV allows PPD to degrade late transcripts that arise  
302 as a consequence of cryptic transcription at 24 hpi (Fig 2 and 6A). However, at the  
303 appropriate time of expression, KSHV blocks PPD so late genes are expressed (Fig 4A-  
304 C). The long co-evolution of herpesviruses with their specific hosts has selected for  
305 sophisticated host-pathogen interactions. These contrasting interactions with the host  
306 RNA QC pathways represent intriguing examples of virus-host co-evolution that ensures  
307 KSHV expresses its genes in a precise temporal manner.

308  
309 Our observations also contribute to the understanding of the distinctions between host  
310 PPD, PAXT and ARS2-mediated decay processes. While it seems likely that PPD and  
311 PAXT represent the same pathway, it has been reported that ARS2 is involved in PAXT  
312 recruitment to unstable transcripts (20). However, in the context of KSHV infection, PPD  
313 and an ARS2-mediated decay pathway appear to be independent pathways. For  
314 example, simultaneous depletion of PAP $\alpha$ / $\gamma$  and ARS2 resulted in greater stabilization of  
315 viral transcripts than depletion of either alone during iSLK- $\Delta$ ORF57 reactivation (29).  
316 Furthermore, we show that depletion of PAP $\alpha$ / $\gamma$  enhances specific viral genes, while  
317 ARS2 depletion has little effect (Figs 1 and 2). Importantly, we show that depletion of  
318 ZFC3H1, a PAXT component, mimics PAP $\alpha$ / $\gamma$  depletion as the same group of viral genes  
319 are upregulated (Fig 2). Overall, these data suggest that PPD and PAXT represent the  
320 same process, but ARS2 is not absolutely required for PPD/PAXT-mediated decay.  
321 However, more work is needed to completely define the overlap and independence of  
322 these RNA QC pathways.

323

324 PPD inactivation results in the aberrant temporal expression of KSHV late genes.  
325 However, this atypical expression of late genes does not affect viral genome replication  
326 or production of infectious virions in our iSLK cells (Fig 4D & E). Several reasons may  
327 explain this unexpected result. Even though PAP knockdown increases late gene  
328 expression levels relative to cells treated with a control siRNA, the expression levels  
329 reached may not be high enough to affect viral fitness. Indeed, expression of late genes  
330 at 48 or 72 hpi is considerably higher than at 24 hpi (Fig 4A-C). Consequently, the levels  
331 of late genes reached at 24 hpi may not be sufficient to disrupt viral physiology in iSLK  
332 cells. Another possibility is that the virus uses PPD to keep expression levels of late genes  
333 low during early phases of lytic infection as these may elicit an immune response in an  
334 infected organism. Indeed, circulating anti-K8.1 antibodies detected in Kaposi's sarcoma  
335 patients support that this PPD-restricted gene elicits an immune response (58-60). If the  
336 role of PPD is to keep potentially immunogenic genes low, we would miss this phenotype  
337 in a cell culture system.

338

339 Late transcripts evade PPD during late phases of replication, but the mechanism of PPD  
340 evasion is not completely understood. Our data show that the host factor NRDE2 is  
341 required for evasion of PPD during late infection (Fig 5). NRDE2 function is linked to its  
342 residence in nuclear speckles, where it interacts with MTR4 to inhibit its activity thereby  
343 protecting speckle-associated mRNAs (54). As expression of KSHV late genes occurs at  
344 the onset of viral genome replication, we speculate that NRDE2 re-localizes to replication  
345 compartments (Fig 6B). When this occurs, NRDE2 interacts with MTR4 preventing the  
346 recruitment of the nuclear exosome to viral transcripts. Consequently, late transcripts

347 evade PPD and are properly expressed. Supporting this idea, HSV1 replication  
348 compartments coalesce with nuclear speckles (61), but whether this occurs in KSHV has  
349 yet to be tested.

350

351 Additional factors may contribute to protection of late transcripts from PPD during late  
352 phases of KSHV reactivation. For example, expression of KSHV late genes requires the  
353 action of several viral transactivation factors (48-52). ORF24 is essential to recruit RNA  
354 pol II and other viral transactivation factors to late gene promoters (51). In principle,  
355 ORF24-induced transcription may promote the co-transcriptional recruitment of factors  
356 that protect transcripts from degradation. Evasion and exploitation of nuclear RNA decay  
357 pathways by KSHV is only beginning to be understood. Further experimentation is  
358 needed to substantiate the role of NRDE2 and identify other factors involved in these  
359 processes.

360

361

## 362 **Materials and Methods**

363

### 364 **RNA-seq: library preparation**

365

366 iSLK WT cells were transfected with a non-targeting control siRNA or a two-siRNA pool  
367 targeting PAP $\alpha$  and PAP $\gamma$  (PAP $\alpha/\gamma$ ), ARS2 or both PAP $\alpha/\gamma$  and ARS2 combined (dKD)  
368 using the concentrations specified in the siRNA transfection section. Total RNA was  
369 harvested three days after siRNA transfection and 24 hours post lytic reactivation. One



370 µg of intact total RNA per condition was used to make stranded mRNA-seq libraries with  
371 the Stranded mRNA-Seq kit (KAPA Biosystems) as per manufacturer's protocol. The  
372 strand-specific single-end RNA-sequencing was performed using Illumina HiSeq2500.

373

### 374 **RNA-seq analysis**

375

376 The qualities of sequencing reads were evaluated using NGS QC Toolkit (v2.3.3) (62)  
377 and high-quality reads were extracted. The human reference genome sequence and gene  
378 annotation data, hg19, were downloaded from Illumina iGenomes  
379 ([https://support.illumina.com/sequencing/sequencing\\_software/igenome.html](https://support.illumina.com/sequencing/sequencing_software/igenome.html)). The viral  
380 genome was downloaded from NCBI GenBank  
381 (<https://www.ncbi.nlm.nih.gov/nucore/GQ994935.1>). The qualities of RNA-sequencing  
382 libraries were estimated by mapping the reads onto human transcript and ribosomal RNA  
383 sequences (Ensembl release 89) using Bowtie (v2.2.9) (63). STAR (v2.5.2b) (53) was  
384 employed to align the reads onto the human and viral genomes, Picard (v1.140)  
385 (<https://broadinstitute.github.io/picard/>) was employed to sort the alignments, and HTSeq  
386 Python package (64) was employed to count reverse-stranded reads per gene. DESeq2  
387 R Bioconductor package (65) was used to normalize read counts and identify differentially  
388 expressed (DE) genes. The resulting gene expression analyses are given in  
389 Supplementary Tables S1 for viral genes exclusively and S2 for human plus viral genes.  
390 The enrichment of DE genes to pathways and GOs were calculated by Fisher's exact test  
391 in R statistical package. Genome coverages were calculated using SAMtools (v0.1.19)  
392 (66), BEDTools (v2.26) (67), and bedGraphToBigWig

393 (<https://genome.ucsc.edu/index.html>). The heatmap was generated using Morpheus from  
394 the Broad Institute (<https://software.broadinstitute.org/morpheus/>).  
395 The data discussed in this publication have been deposited in NCBI's Gene Expression  
396 Omnibus (68) and are accessible through GEO Series accession number GSE144747  
397 (<https://www.ncbi.nlm.nih.gov/geo/query/acc.cgi?acc=GSE144747>).

398

### 399 **Cell Culture**

400

401 iSLK cells were grown at 37°C with 5% CO<sub>2</sub> in DMEM (Sigma) supplemented with  
402 10% Tet-Free fetal bovine serum (FBS, Atlanta Biologicals), 1x penicillin-streptomycin  
403 (Sigma), and 2 mM L-glutamine (Fisher). iSLK WT cells were grown in the presence of  
404 0.1 mg/mL G418 (Fisher), 1 µg/mL puromycin (Sigma) and 50 µg/mL hygromycin. iSLK-  
405 ORF24<sup>R328A</sup> cells (gift from Dr. Britt Glaunsinger, University of California Berkeley) were  
406 grown under the same conditions, except 200 µg/mL of hygromycin was used.

407

### 408 **siRNA Transfections**

409

410 iSLK cells were transfected with 20 or 40 nM siRNA (Silencer Select, ThermoFisher)  
411 using RNAiMAX transfection reagent (Invitrogen) per manufacturer's instruction.  
412 Specifically, we used final concentrations of 40 nM siRNAs for ZFC3H1, MTR4 and  
413 NRDE2 and 20 nM siRNAs ARS2. For PAPα/γ, we used 20 nM each of siRNAs that target  
414 PAPα or PAPγ for a total of 40 nM siRNA. Twenty-four hours after siRNA transfection,  
415 cells were split into new plates and allowed to grow for another 24 hours, after which

416 doxycycline and NaB was added to induce lytic reactivation. Thus, total RNA was  
417 harvested 72 hours post siRNA transfection and 24 hours post lytic reactivation.  
418 Nontargeting control, PAPA $\alpha/\gamma$ , ZC3H1 and MTR4 siRNAs are the same as previously  
419 used (29). NRDE2 siRNAs are: 5' GGUGUUGUUUGAUGAUUUtt 3' (s30063) and 5'  
420 GUUUAGUACCUUUUCGAUAtt 3' (s30064).

421

## 422 **Quantitative RT-PCR**

423

424 RNA was harvested using TRI reagent (Molecular Research Center, Inc.) according to  
425 the manufacturer's protocol. Following extraction, RNA was treated with RQ1 DNase  
426 (Promega). Oligo dT<sub>20</sub> was used to prime cDNA synthesis with MuLV reverse  
427 transcriptase (New England Biolabs). Real-time reactions used iTaq Universal SYBR  
428 Green Supermix (Biorad). Primers are listed in Table S3.

429

## 430 **KSHV Reactivation and Infection**

431

432 Lytic reactivation of iSLK derived cells was achieved by adding doxycycline (1  $\mu$ g/ml) and  
433 NaB (1mM). Tissue culture supernatants from iSLK WT cells were collected at 0, 8, 12,  
434 24, 48 and 72 hpi, centrifuged for 5 min at 1000 x g and passed through a 0.45  $\mu$ m filter.  
435 Polybrene was added (8  $\mu$ g/mL final concentration), and 300  $\mu$ L were applied to HEK293  
436 cells grown in a 12-well plate. Cells were centrifuged for 45 min at 30°C and then  
437 incubated in 5% CO<sub>2</sub> at 37°C for 2 hours. After this, media was replaced and cells were  
438 analyzed by flow cytometry 24 hours later.

439

## 440 **Western Blotting**

441

442 Cells were lysed in buffer containing 100 mM NaCl, 50 mM Tris-HCl pH 7.4, 1% Triton X-  
443 100, 1X Protease Inhibitor cocktail (PIC) (Calbiochem) and 250  $\mu$ M PMSF. Proteins were  
444 resolved by SDS-PAGE and analyzed by western blot using standard procedures.  
445 Antibodies used are rabbit polyclonal anti-ARS2 (Abcam, ab192999), rabbit polyclonal  
446 anti-MTR4 (Abcam, Ab70551), rabbit polyclonal anti-NRDE2 (Proteintech, 24968) and  
447 mouse monoclonal anti-Actin (Abcam, ab6276). Quantitative westerns were performed  
448 using infrared detection with an Odyssey Fc and quantification was performed using  
449 ImageStudio software (LI-COR Biosciences).

450

451

## 452 **Acknowledgements**

453

454 We thank Anna Scarborough and Juliana Flaherty for critical review of this manuscript.

455 We thank Dr. Divya Nandakumar, Jennifer Blancas and Dr. Britt Glaunsinger (UC  
456 Berkeley) for the iSLK ORF24<sup>R328A</sup> cells. We thank Spencer Barnes (UTSW) for GEO  
457 submission. The work was supported by NIH/NIAID R01 AI123165 (to N.K.C.), the Welch  
458 Foundation I-1915-20170325 (to N.K.C) and Cancer Prevention and Research Institute  
459 of Texas RP150596 (to the Bioinformatics Core Facility, UTSW).

460

461

462 **Figure Legends**

463

464 **Fig 1. PPD inactivation affects the temporal expression of KSHV late genes. (A)**

465 Diagram of the RNA-seq experiment. iSLK WT cells were transfected with a non-targeting  
466 control siRNA or a two-siRNA pool targeting PAP $\alpha$ / $\gamma$ , ARS2, or both PAP $\alpha$ / $\gamma$  and ARS2  
467 combined (dKD). Total RNA was harvested three days after siRNA transfection and 24  
468 hours after lytic reactivation. Stranded mRNA-seq libraries were prepared and  
469 sequenced. (B) Efficiency of knockdown of PAP $\alpha$ , PAP $\gamma$ , and ARS2 in iSLK WT cells.  
470 Due to the lack of robust antibodies, PAP $\alpha$  and PAP $\gamma$  knockdown efficiency was  
471 determined by qRT-PCR. Bar graphs show PAP $\alpha$  and PAP $\gamma$  mRNA levels in iSLK WT  
472 cells treated with siRNAs targeting PAP $\alpha$  and PAP $\gamma$ . Because RNA knockdown does not  
473 necessarily correlate with protein loss, we assayed for loss of functional activity. To do  
474 so, we measured the RNA levels of a known PPD target, NEAT1, under the same  
475 conditions used for RNA-seq. Bar graph shows NEAT1 levels determined by qRT-PCR  
476 in iSLK WT cells depleted of PAP $\alpha$ / $\gamma$ . Values are displayed relative to siCtrl after  
477 normalization to the 18S rRNA level. All values are averages, and the error bars are  
478 standard deviations (n = 3). ARS2 knockdown efficiency was determined by quantitative  
479 western blot. Actin serves as loading control. (C) Heatmap showing the log<sub>2</sub> fold change  
480 (FC) relative to siCtrl for all KSHV genes in samples depleted of PAP $\alpha$ / $\gamma$ , ARS2 or dKD.  
481 Genes are arranged in increasing log<sub>2</sub> FC order based on PAP $\alpha$ / $\gamma$ , where red represents  
482 maximum fold change and blue represents Log<sub>2</sub> FC <1.5. (D) Pie charts showing the  
483 distribution of upregulated (>4-fold) KSHV genes in PAP $\alpha$ / $\gamma$  (top) and dKD (bottom)  
484 according to their phase of expression (30).

485

486 **Fig 2. KSHV late transcripts are degraded by PPD/PAXT.** (A) Efficiency of knockdown  
487 of ZFC3H1 and MTR4 in iSLK WT cells. Bar graphs show ZFC3H1 and NEAT1 mRNA  
488 levels in iSLK WT cells treated with ZFC3H1 siRNAs. Increased levels of NEAT1 indicate  
489 that PPD was effectively inactivated upon ZFC3H1 depletion. MTR4 knockdown  
490 efficiency was determined by quantitative western blot. Actin serves as loading control.  
491 (\*) nonspecific band. (B, D and F) Integrative genome viewer (IGV) browser screenshots  
492 showing ORF75 (B), ORF52 (D) and K8.1 (F) reads in samples depleted of PAP $\alpha$ / $\gamma$ , ARS2  
493 or dKD. Each condition is depicted at the same scale. (C, E and G) Bar graphs showing  
494 relative ORF75 (C), ORF52 (E) and K8.1 (G) mRNA levels in iSLK WT cells depleted of  
495 PAP $\alpha$ / $\gamma$  (green), ARS2 (orange), dKD (red), ZFC3H1 (purple) and MTR4 (light blue). Total  
496 RNA was harvested 24 hpi and analyzed by qRT-PCR. Values are displayed relative to  
497 siCtrl after normalization to the 18S rRNA level. All values are averages, and the error  
498 bars are standard deviations (n = 3). *P* values were determined by two-tailed unpaired  
499 Student's *t* test: \* < 0.05; \*\* < 0.01; \*\*\* < 0.001.

500

501 **Fig 3. PPD upregulation of late genes is independent of ORF24.** (A) IGV browser  
502 screenshot showing ORF24 reads in samples depleted of PAP $\alpha$ / $\gamma$ , ARS2 or dKD. (B) Bar  
503 graphs showing relative ORF24 mRNA levels in iSLK cells depleted of PAP $\alpha$ / $\gamma$  (green),  
504 ARS2 (orange) and dKD (red). (C) Bar graphs showing relative ORF52, ORF75 and K8.1  
505 mRNA level in iSLK WT (gray) and iSLK ORF24<sup>R328A</sup> (white) cells at 48 hpi. (D, E and F)  
506 Bar graphs showing relative ORF52 (D), ORF75 (E) and K8.1 (F) mRNA levels in iSLK  
507 ORF24<sup>R328A</sup> cells depleted of PAP $\alpha$ / $\gamma$  (green), ARS2 (orange), dKD (red), ZFC3H1

508 (purple) and MTR4 (light blue). Total RNA was harvested 24 hpi and analyzed by qRT-  
509 PCR. Values are displayed relative to siCtrl after normalization to the 18S rRNA level. All  
510 values are averages, and the error bars are standard deviations ( $n = 3$ ).  $P$  values were  
511 determined by two-tailed unpaired Student's  $t$  test: \*  $< 0.05$ ; \*\*  $< 0.01$ ; \*\*\*  $< 0.001$ .

512

513 **Fig 4. KSHV late transcripts evade PPD degradation at their proper time of**

514 **expression** (A, B and C) Bar graphs showing relative ORF75 (A), ORF52 (B) and K8.1

515 (C) mRNA levels in iSLK WT cells treated with siRNAs targeting PAP $\alpha$ / $\gamma$  (green) or a

516 control siRNA (gray). Total RNA was harvested at 24, 48 and 72 hpi. Values were

517 calculated relative to siCtrl at 24 hpi (gray) and normalized to the 18S rRNA level. Note

518 that the data are plotted on a log scale due to the strong up-regulation of late genes after

519 48 hpi. (D) Bar graphs showing relative ORF57 DNA levels in iSLK WT cells depleted of

520 PAP $\alpha$ / $\gamma$  (green) or ZFC3H1 (purple). DNA was harvested at 0, 12, 24 and 48 hpi. Values

521 were calculated relative to siCtrl (gray) at 0 hpi. (E) Bar graph of flow cytometry analysis

522 showing percentage of GFP-positive HEK293 cells infected with supernatants collected

523 from iSLK WT cells at 0, 8, 12, 24, 48 and 72 hpi. All values are averages, and the error

524 bars are standard deviations ( $n = 3$ ).  $P$  values were determined by Student's  $t$  test: \*  $<$

525 0.05; \*\*  $< 0.01$ ; \*\*\*  $< 0.0001$ .

526

527 **Fig 5. NRDE2 protects viral late transcripts from degradation.** (A) NRDE2 knockdown

528 efficiency was determined by quantitative western blot. Actin serves as loading control.

529 (\*) nonspecific band. (B and C) Bar graphs showing relative ORF75, ORF52 and K8.1

530 mRNA levels at 24 (B) and 48 (C) hpi in iSLK WT depleted of PAP $\alpha$ / $\gamma$  (green), NRDE2

531 (orange) and PAP $\alpha$ / $\gamma$  and NRDE2 combined (blue). Total RNA was harvested 24 or 48  
532 hpi and analyzed by qRT-PCR. Values are displayed relative to siCtrl after normalization  
533 to the 18S rRNA level. All values are averages, and the error bars are standard deviations  
534 ( $n = 3$ ).  $P$  values were determined by two-tailed unpaired Student's  $t$  test: \*  $< 0.05$ ; \*\*  $<$   
535  $0.01$ ; \*\*\*  $< 0.001$ .

536

537 **Fig 6. Model of PPD regulation of KSHV late genes.** (A) KSHV late genes are  
538 cryptically transcribed at 24 hpi, but the transcripts do not accumulate due to PPD. (B) At  
539 48 hpi, KSHV late transcripts evade PPD and accumulate at high levels. We speculate  
540 that KSHV replication compartments coalesce with nuclear speckles where NRDE2  
541 protects viral transcripts from PPD degradation by sequestering MTR4.

542

543 **Table S1. Differential expression of KSHV genes.** This spreadsheet contains the  
544 expression levels of all KSHV genes in samples depleted of PAP $\alpha$ / $\gamma$ , ARS2 and dKD  
545 relative to siCtrl.

546

547 **Table S2. Differential expression of human and KSHV genes.** This spreadsheet  
548 contains the expression levels of human and KSHV genes in samples depleted of  
549 PAP $\alpha$ / $\gamma$ , ARS2 and dKD relative to siCtrl.

550

551 **Table S3. Primers used in this study.** Target, sequence, and primer number (ID) for  
552 all PCR primers used herein.

553



554

555 **References**

556

- 557 1. Dittmer DP, Damania B. 2016. Kaposi sarcoma-associated herpesvirus:  
558 immunobiology, oncogenesis, and therapy. *J Clin Invest* 126:3165-75.
- 559 2. Kaplan LD. 2013. Human herpesvirus-8: Kaposi sarcoma, multicentric Castleman  
560 disease, and primary effusion lymphoma. *Hematology Am Soc Hematol Educ*  
561 *Program* 2013:103-8.
- 562 3. Ruocco E, Ruocco V, Tornesello ML, Gambardella A, Wolf R, Buonaguro FM.  
563 2013. Kaposi's sarcoma: etiology and pathogenesis, inducing factors, causal  
564 associations, and treatments: facts and controversies. *Clin Dermatol* 31:413-422.
- 565 4. Staudt MR, Dittmer DP. 2003. Viral latent proteins as targets for Kaposi's sarcoma  
566 and Kaposi's sarcoma-associated herpesvirus (KSHV/HHV-8) induced lymphoma.  
567 *Curr Drug Targets Infect Disord* 3:129-35.
- 568 5. Bellare P, Ganem D. 2009. Regulation of KSHV lytic switch protein expression by  
569 a virus-encoded microRNA: an evolutionary adaptation that fine-tunes lytic  
570 reactivation. *Cell Host Microbe* 6:570-5.
- 571 6. Deng H, Liang Y, Sun R. 2007. Regulation of KSHV lytic gene expression. *Curr*  
572 *Top Microbiol Immunol* 312:157-83.
- 573 7. Staudt MR, Dittmer DP. 2007. The Rta/Orf50 transactivator proteins of the gamma-  
574 herpesviridae. *Curr Top Microbiol Immunol* 312:71-100.
- 575 8. Bresson S, Tollervey D. 2018. Surveillance-ready transcription: nuclear RNA  
576 decay as a default fate. *Open Biol* 8.

- 577 9. Doma MK, Parker R. 2007. RNA quality control in eukaryotes. *Cell* 131:660-8.
- 578 10. Fasken MB, Corbett AH. 2009. Mechanisms of nuclear mRNA quality control. *RNA*  
579 *Biol* 6:237-41.
- 580 11. Garland W, Jensen TH. 2019. Nuclear sorting of RNA. *Wiley Interdiscip Rev RNA*  
581 doi:10.1002/wrna.1572:e1572.
- 582 12. Maquat LE, Kiledjian M. 2008. RNA turnover in eukaryotes: analysis of specialized  
583 and quality control RNA decay pathways. Preface. *Methods Enzymol* 449:xvii-xviii.
- 584 13. Andersen PR, Domanski M, Kristiansen MS, Storvall H, Ntini E, Verheggen C,  
585 Schein A, Bunkenborg J, Poser I, Hallais M, Sandberg R, Hyman A, LaCava J,  
586 Rout MP, Andersen JS, Bertrand E, Jensen TH. 2013. The human cap-binding  
587 complex is functionally connected to the nuclear RNA exosome. *Nat Struct Mol*  
588 *Biol* 20:1367-76.
- 589 14. Bresson SM, Hunter OV, Hunter AC, Conrad NK. 2015. Canonical Poly(A)  
590 Polymerase Activity Promotes the Decay of a Wide Variety of Mammalian Nuclear  
591 RNAs. *PLoS Genet* 11:e1005610.
- 592 15. Ogami K, Richard P, Chen Y, Hoque M, Li W, Moresco JJ, Yates JR, 3rd, Tian B,  
593 Manley JL. 2017. An Mtr4/ZFC3H1 complex facilitates turnover of unstable nuclear  
594 RNAs to prevent their cytoplasmic transport and global translational repression.  
595 *Genes Dev* 31:1257-1271.
- 596 16. Flynn RA, Almada AE, Zamudio JR, Sharp PA. 2011. Antisense RNA polymerase  
597 II divergent transcripts are P-TEFb dependent and substrates for the RNA  
598 exosome. *Proc Natl Acad Sci U S A* 108:10460-5.

- 599 17. Preker P, Almvig K, Christensen MS, Valen E, Mapendano CK, Sandelin A, Jensen  
600 TH. 2011. PROMoter uPstream Transcripts share characteristics with mRNAs and  
601 are produced upstream of all three major types of mammalian promoters. *Nucleic*  
602 *Acids Res* 39:7179-93.
- 603 18. Preker P, Nielsen J, Kammler S, Lykke-Andersen S, Christensen MS, Mapendano  
604 CK, Schierup MH, Jensen TH. 2008. RNA exosome depletion reveals transcription  
605 upstream of active human promoters. *Science* 322:1851-4.
- 606 19. Bresson SM, Conrad NK. 2013. The human nuclear poly(a)-binding protein  
607 promotes RNA hyperadenylation and decay. *PLoS Genet* 9:e1003893.
- 608 20. Meola N, Domanski M, Karadoulama E, Chen Y, Gentil C, Pultz D, Vitting-Seerup  
609 K, Lykke-Andersen S, Andersen JS, Sandelin A, Jensen TH. 2016. Identification  
610 of a Nuclear Exosome Decay Pathway for Processed Transcripts. *Mol Cell* 64:520-  
611 533.
- 612 21. Lubas M, Christensen MS, Kristiansen MS, Domanski M, Falkenby LG, Lykke-  
613 Andersen S, Andersen JS, Dziembowski A, Jensen TH. 2011. Interaction profiling  
614 identifies the human nuclear exosome targeting complex. *Mol Cell* 43:624-37.
- 615 22. Lingaraju M, Johnsen D, Schlundt A, Langer LM, Basquin J, Sattler M, Heick  
616 Jensen T, Falk S, Conti E. 2019. The MTR4 helicase recruits nuclear adaptors of  
617 the human RNA exosome using distinct arch-interacting motifs. *Nat Commun*  
618 10:3393.
- 619 23. Beaulieu YB, Kleinman CL, Landry-Voyer AM, Majewski J, Bachand F. 2012.  
620 Polyadenylation-dependent control of long noncoding RNA expression by the  
621 poly(A)-binding protein nuclear 1. *PLoS Genet* 8:e1003078.

- 622 24. Giacometti S, Benbahouche NEH, Domanski M, Robert MC, Meola N, Lubas M,  
623 Bukenborg J, Andersen JS, Schulze WM, Verheggen C, Kudla G, Jensen TH,  
624 Bertrand E. 2017. Mutually Exclusive CBC-Containing Complexes Contribute to  
625 RNA Fate. *Cell Rep* 18:2635-2650.
- 626 25. Schulze WM, Stein F, Rettel M, Nanao M, Cusack S. 2018. Structural analysis of  
627 human ARS2 as a platform for co-transcriptional RNA sorting. *Nat Commun*  
628 9:1701.
- 629 26. Hallais M, Pontvianne F, Andersen PR, Clerici M, Lener D, Benbahouche Nel H,  
630 Gostan T, Vandermoere F, Robert MC, Cusack S, Verheggen C, Jensen TH,  
631 Bertrand E. 2013. CBC-ARS2 stimulates 3'-end maturation of multiple RNA  
632 families and favors cap-proximal processing. *Nat Struct Mol Biol* 20:1358-66.
- 633 27. Iasillo C, Schmid M, Yahia Y, Maqbool MA, Descostes N, Karadoulama E,  
634 Bertrand E, Andrau JC, Jensen TH. 2017. ARS2 is a general suppressor of  
635 pervasive transcription. *Nucleic Acids Res* 45:10229-10241.
- 636 28. Fan J, Kuai B, Wu G, Wu X, Chi B, Wang L, Wang K, Shi Z, Zhang H, Chen S, He  
637 Z, Wang S, Zhou Z, Li G, Cheng H. 2017. Exosome cofactor hMTR4 competes  
638 with export adaptor ALYREF to ensure balanced nuclear RNA pools for  
639 degradation and export. *EMBO J* 36:2870-2886.
- 640 29. Ruiz JC, Hunter OV, Conrad NK. 2019. Kaposi's sarcoma-associated herpesvirus  
641 ORF57 protein protects viral transcripts from specific nuclear RNA decay pathways  
642 by preventing hMTR4 recruitment. *PLoS Pathog* 15:e1007596.
- 643 30. Arias C, Weisburd B, Stern-Ginossar N, Mercier A, Madrid AS, Bellare P, Holdorf  
644 M, Weissman JS, Ganem D. 2014. KSHV 2.0: a comprehensive annotation of the

- 645 Kaposi's sarcoma-associated herpesvirus genome using next-generation  
646 sequencing reveals novel genomic and functional features. PLoS Pathog  
647 10:e1003847.
- 648 31. Zheng ZM. 2003. Split genes and their expression in Kaposi's sarcoma-associated  
649 herpesvirus. Rev Med Virol 13:173-84.
- 650 32. Duan W, Wang S, Liu S, Wood C. 2001. Characterization of Kaposi's sarcoma-  
651 associated herpesvirus/human herpesvirus-8 ORF57 promoter. Arch Virol  
652 146:403-13.
- 653 33. Han Z, Swaminathan S. 2006. Kaposi's sarcoma-associated herpesvirus lytic gene  
654 ORF57 is essential for infectious virion production. J Virol 80:5251-60.
- 655 34. Majerciak V, Pripuzova N, McCoy JP, Gao SJ, Zheng ZM. 2007. Targeted  
656 disruption of Kaposi's sarcoma-associated herpesvirus ORF57 in the viral genome  
657 is detrimental for the expression of ORF59, K8alpha, and K8.1 and the production  
658 of infectious virus. J Virol 81:1062-71.
- 659 35. Majerciak V, Yamanegi K, Allemand E, Kruhlak M, Krainer AR, Zheng ZM. 2008.  
660 Kaposi's sarcoma-associated herpesvirus ORF57 functions as a viral splicing  
661 factor and promotes expression of intron-containing viral lytic genes in  
662 spliceosome-mediated RNA splicing. J Virol 82:2792-801.
- 663 36. Malik P, Blackbourn DJ, Cheng MF, Hayward GS, Clements JB. 2004. Functional  
664 co-operation between the Kaposi's sarcoma-associated herpesvirus ORF57 and  
665 ORF50 regulatory proteins. J Gen Virol 85:2155-66.

- 666 37. Malik P, Schirmer EC. 2006. The Kaposi's sarcoma-associated herpesvirus  
667 ORF57 protein: a pleurotropic regulator of gene expression. *Biochem Soc Trans*  
668 34:705-10.
- 669 38. Palmeri D, Spadavecchia S, Carroll KD, Lukac DM. 2007. Promoter- and cell-  
670 specific transcriptional transactivation by the Kaposi's sarcoma-associated  
671 herpesvirus ORF57/Mta protein. *J Virol* 81:13299-314.
- 672 39. Sei E, Conrad NK. 2011. Delineation of a core RNA element required for Kaposi's  
673 sarcoma-associated herpesvirus ORF57 binding and activity. *Virology* 419:107-16.
- 674 40. Conrad NK. 2016. New insights into the expression and functions of the Kaposi's  
675 sarcoma-associated herpesvirus long noncoding PAN RNA. *Virus Res* 212:53-63.
- 676 41. Kirshner JR, Lukac DM, Chang J, Ganem D. 2000. Kaposi's sarcoma-associated  
677 herpesvirus open reading frame 57 encodes a posttranscriptional regulator with  
678 multiple distinct activities. *J Virol* 74:3586-97.
- 679 42. Majerciak V, Pripuzova N, Chan C, Temkin N, Specht SI, Zheng ZM. 2015. Stability  
680 of structured Kaposi's sarcoma-associated herpesvirus ORF57 protein is regulated  
681 by protein phosphorylation and homodimerization. *J Virol* 89:3256-74.
- 682 43. Massimelli MJ, Kang JG, Majerciak V, Le SY, Liewehr DJ, Steinberg SM, Zheng  
683 ZM. 2011. Stability of a long noncoding viral RNA depends on a 9-nt core element  
684 at the RNA 5' end to interact with viral ORF57 and cellular PABPC1. *Int J Biol Sci*  
685 7:1145-60.
- 686 44. Nekorchuk M, Han Z, Hsieh TT, Swaminathan S. 2007. Kaposi's sarcoma-  
687 associated herpesvirus ORF57 protein enhances mRNA accumulation  
688 independently of effects on nuclear RNA export. *J Virol* 81:9990-8.

- 689 45. Sahin BB, Patel D, Conrad NK. 2010. Kaposi's sarcoma-associated herpesvirus  
690 ORF57 protein binds and protects a nuclear noncoding RNA from cellular RNA  
691 decay pathways. *PLoS Pathog* 6:e1000799.
- 692 46. Brulois KF, Chang H, Lee AS, Ensser A, Wong LY, Toth Z, Lee SH, Lee HR,  
693 Myoung J, Ganem D, Oh TK, Kim JF, Gao SJ, Jung JU. 2012. Construction and  
694 manipulation of a new Kaposi's sarcoma-associated herpesvirus bacterial artificial  
695 chromosome clone. *J Virol* 86:9708-20.
- 696 47. Myoung J, Ganem D. 2011. Generation of a doxycycline-inducible KSHV producer  
697 cell line of endothelial origin: maintenance of tight latency with efficient reactivation  
698 upon induction. *J Virol Methods* 174:12-21.
- 699 48. Butnaru M, Gaglia MM. 2019. The Kaposi's Sarcoma-Associated Herpesvirus  
700 Protein ORF42 Is Required for Efficient Virion Production and Expression of Viral  
701 Proteins. *Viruses* 11.
- 702 49. Castaneda AF, Glaunsinger BA. 2019. The Interaction between ORF18 and  
703 ORF30 Is Required for Late Gene Expression in Kaposi's Sarcoma-Associated  
704 Herpesvirus. *J Virol* 93.
- 705 50. Chang J, Ganem D. 2000. On the control of late gene expression in Kaposi's  
706 sarcoma-associated herpesvirus (human herpesvirus-8). *J Gen Virol* 81:2039-47.
- 707 51. Davis ZH, Hesser CR, Park J, Glaunsinger BA. 2016. Interaction between ORF24  
708 and ORF34 in the Kaposi's Sarcoma-Associated Herpesvirus Late Gene  
709 Transcription Factor Complex Is Essential for Viral Late Gene Expression. *J Virol*  
710 90:599-604.

- 711 52. Nishimura M, Watanabe T, Yagi S, Yamanaka T, Fujimuro M. 2017. Kaposi's  
712 sarcoma-associated herpesvirus ORF34 is essential for late gene expression and  
713 virus production. *Sci Rep* 7:329.
- 714 53. Brulois K, Wong LY, Lee HR, Sivadas P, Ensser A, Feng P, Gao SJ, Toth Z, Jung  
715 JU. 2015. Association of Kaposi's Sarcoma-Associated Herpesvirus ORF31 with  
716 ORF34 and ORF24 Is Critical for Late Gene Expression. *J Virol* 89:6148-54.
- 717 54. Wang J, Chen J, Wu G, Zhang H, Du X, Chen S, Zhang L, Wang K, Fan J, Gao S,  
718 Wu X, Zhang S, Kuai B, Zhao P, Chi B, Wang L, Li G, Wong CCL, Zhou Y, Li J,  
719 Yun C, Cheng H. 2019. NRDE2 negatively regulates exosome functions by  
720 inhibiting MTR4 recruitment and exosome interaction. *Genes Dev* 33:536-549.
- 721 55. Molleston JM, Sabin LR, Moy RH, Menghani SV, Rausch K, Gordesky-Gold B,  
722 Hopkins KC, Zhou R, Jensen TH, Wilusz JE, Cherry S. 2016. A conserved virus-  
723 induced cytoplasmic TRAMP-like complex recruits the exosome to target viral RNA  
724 for degradation. *Genes Dev* 30:1658-70.
- 725 56. Sabin LR, Zhou R, Gruber JJ, Lukinova N, Bambina S, Berman A, Lau CK,  
726 Thompson CB, Cherry S. 2009. Ars2 regulates both miRNA- and siRNA-  
727 dependent silencing and suppresses RNA virus infection in *Drosophila*. *Cell*  
728 138:340-51.
- 729 57. Sokoloski KJ, Wilusz CJ, Wilusz J. 2006. Viruses: overturning RNA turnover. *RNA*  
730 Biol 3:140-4.
- 731 58. Engels EA, Clark E, Aledort LM, Goedert JJ, Whitby D. 2002. Kaposi's sarcoma-  
732 associated herpesvirus infection in elderly Jews and non-Jews from New York City.  
733 *Int J Epidemiol* 31:946-50.



- 734 59. Li M, MacKey J, Czajak SC, Desrosiers RC, Lackner AA, Jung JU. 1999.  
735 Identification and characterization of Kaposi's sarcoma-associated herpesvirus  
736 K8.1 virion glycoprotein. *J Virol* 73:1341-9.
- 737 60. Wilkinson J, Cope A, Gill J, Bourboulia D, Hayes P, Imami N, Kubo T, Marcelin A,  
738 Calvez V, Weiss R, Gazzard B, Boshoff C, Gotch F. 2002. Identification of Kaposi's  
739 sarcoma-associated herpesvirus (KSHV)-specific cytotoxic T-lymphocyte epitopes  
740 and evaluation of reconstitution of KSHV-specific responses in human  
741 immunodeficiency virus type 1-Infected patients receiving highly active  
742 antiretroviral therapy. *J Virol* 76:2634-40.
- 743 61. Chang L, Godinez WJ, Kim IH, Tektonidis M, de Lanerolle P, Eils R, Rohr K, Knipe  
744 DM. 2011. Herpesviral replication compartments move and coalesce at nuclear  
745 speckles to enhance export of viral late mRNA. *Proc Natl Acad Sci U S A*  
746 108:E136-44.
- 747 62. Patel RK, Jain M. 2012. NGS QC Toolkit: a toolkit for quality control of next  
748 generation sequencing data. *PLoS One* 7:e30619.
- 749 63. Langmead B, Salzberg SL. 2012. Fast gapped-read alignment with Bowtie 2. *Nat*  
750 *Methods* 9:357-9.
- 751 64. Anders S, Pyl PT, Huber W. 2015. HTSeq--a Python framework to work with high-  
752 throughput sequencing data. *Bioinformatics* 31:166-9.
- 753 65. Gentleman RC, Carey VJ, Bates DM, Bolstad B, Dettling M, Dudoit S, Ellis B,  
754 Gautier L, Ge Y, Gentry J, Hornik K, Hothorn T, Huber W, Iacus S, Irizarry R,  
755 Leisch F, Li C, Maechler M, Rossini AJ, Sawitzki G, Smith C, Smyth G, Tierney L,

- 756            Yang JY, Zhang J. 2004. Bioconductor: open software development for  
757            computational biology and bioinformatics. *Genome Biol* 5:R80.
- 758    66.    Li H, Handsaker B, Wysoker A, Fennell T, Ruan J, Homer N, Marth G, Abecasis  
759            G, Durbin R, Genome Project Data Processing S. 2009. The Sequence  
760            Alignment/Map format and SAMtools. *Bioinformatics* 25:2078-9.
- 761    67.    Quinlan AR, Hall IM. 2010. BEDTools: a flexible suite of utilities for comparing  
762            genomic features. *Bioinformatics* 26:841-2.
- 763    68.    Edgar R, Domrachev M, Lash AE. 2002. Gene Expression Omnibus: NCBI gene  
764            expression and hybridization array data repository. *Nucleic Acids Res* 30:207-10.
- 765

# Figure 1

**A**

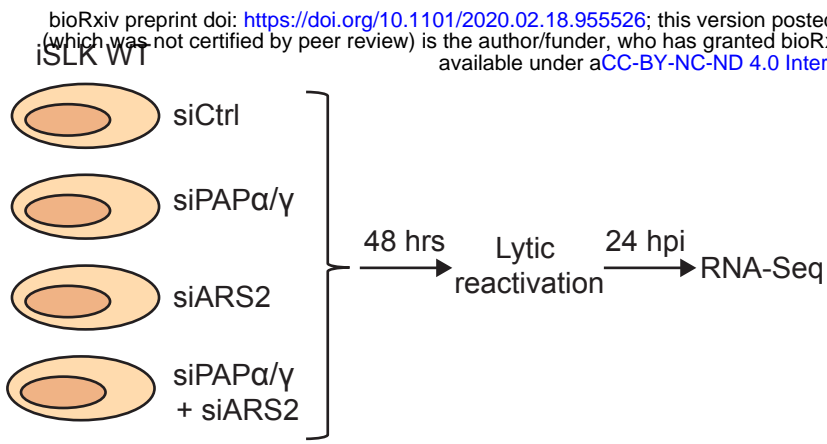

**B**

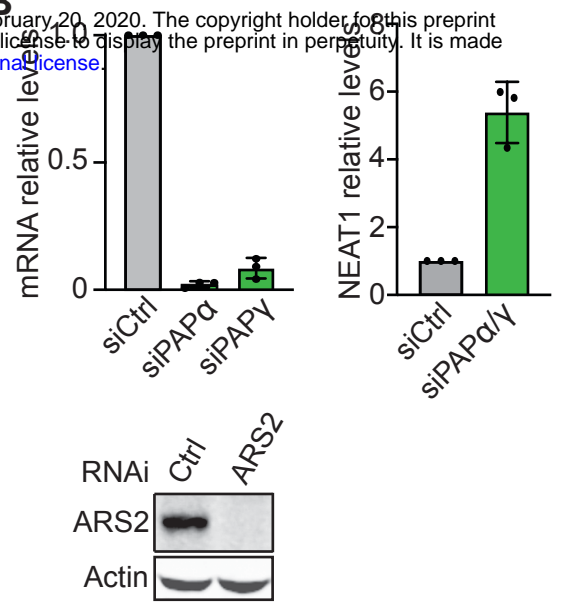

**C**

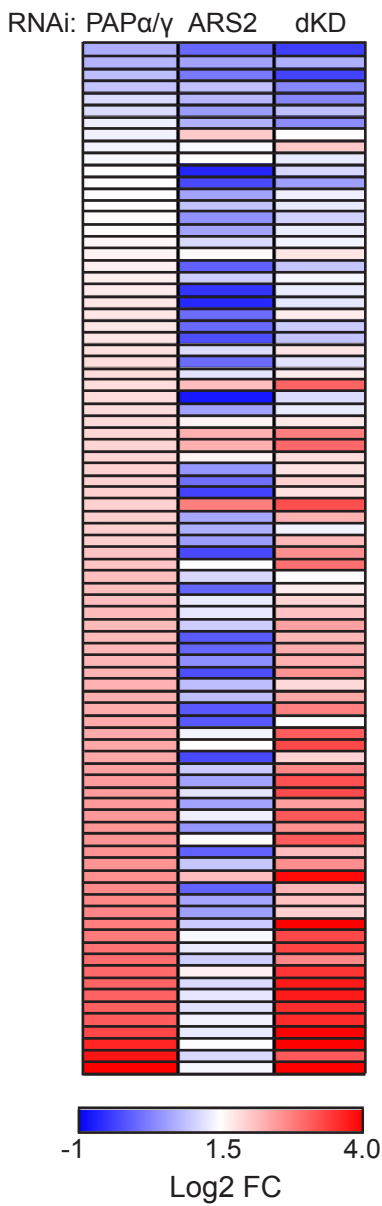

**D**

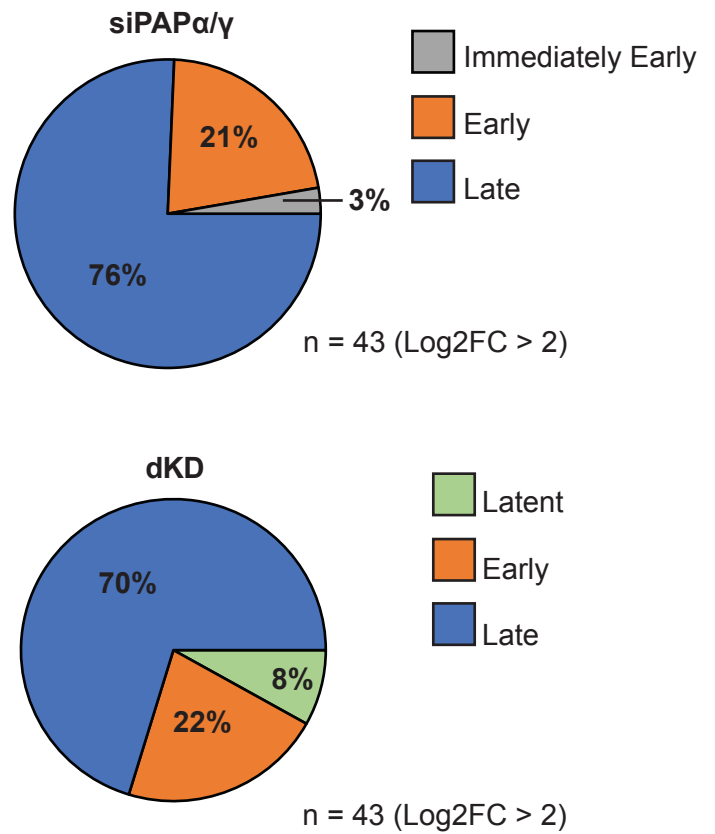

## Figure 2

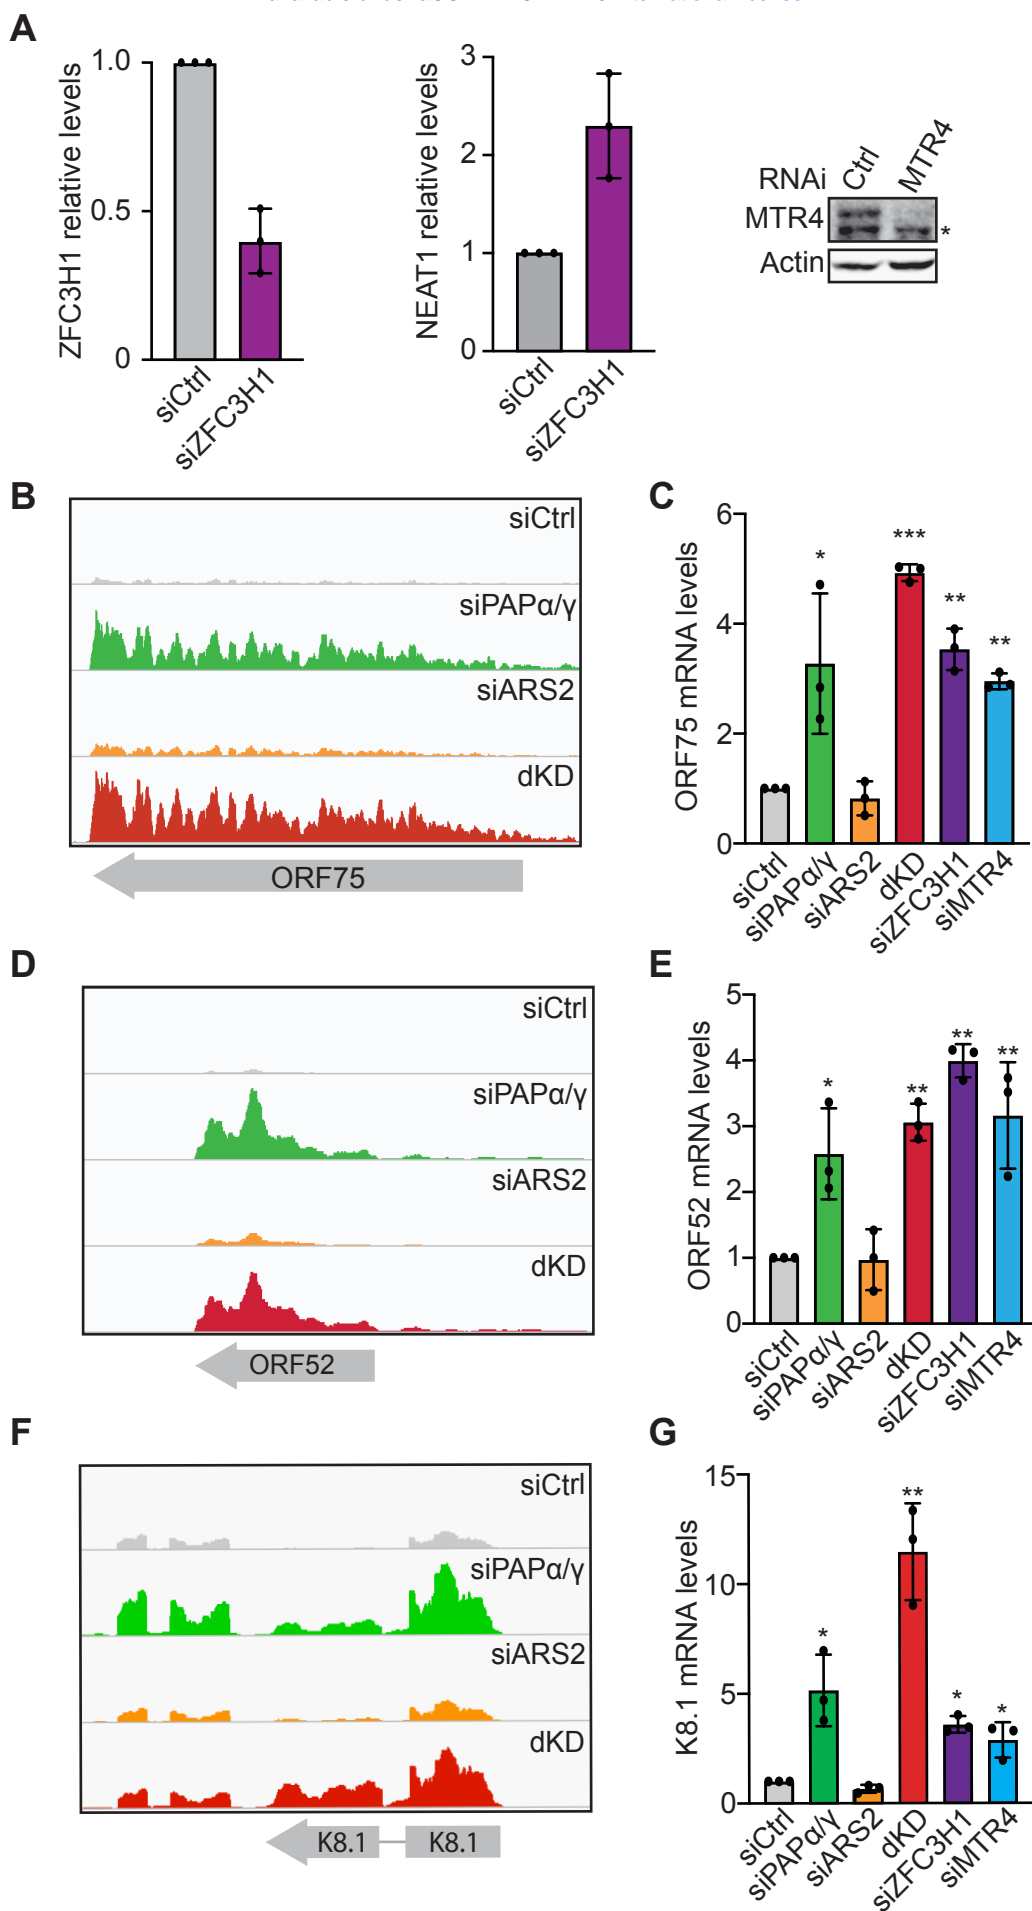

### Figure 3

bioRxiv preprint doi: <https://doi.org/10.1101/2020.02.18.955526>; this version posted February 20, 2020. The copyright holder for this preprint (which was not certified by peer review) is the author/funder, who has granted bioRxiv a license to display the preprint in perpetuity. It is made available under aCC-BY-NC-ND 4.0 International license.

**A**

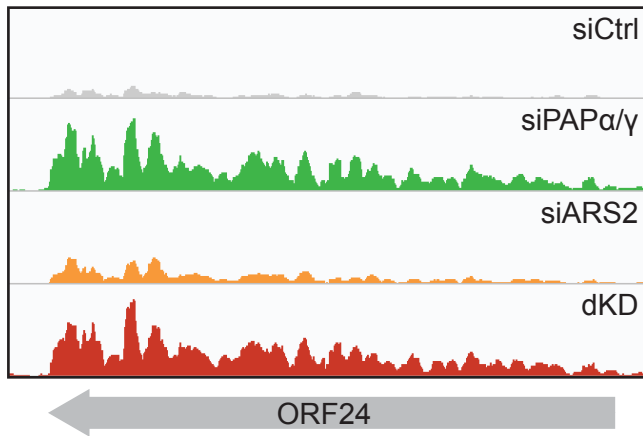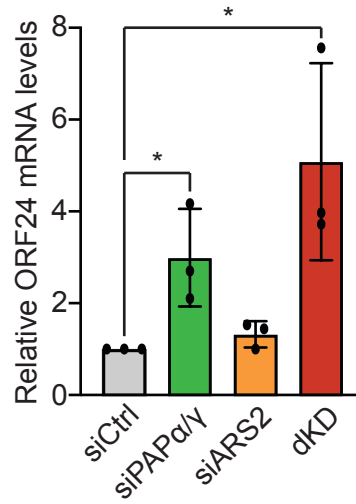

**C**

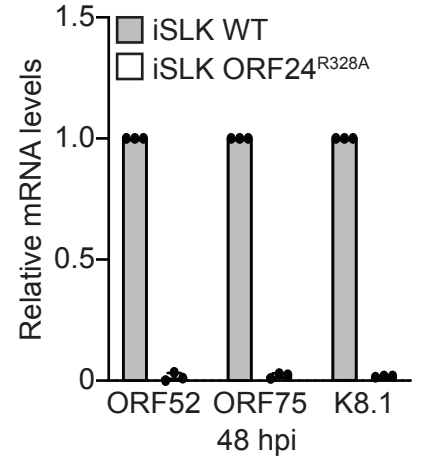

**D**

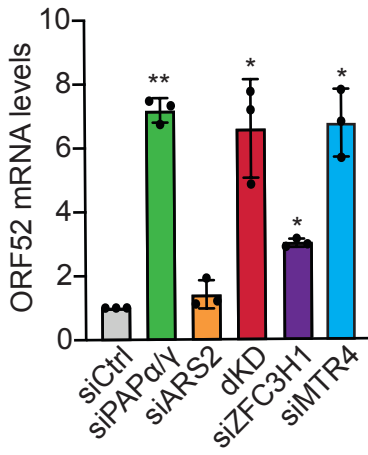

**E**

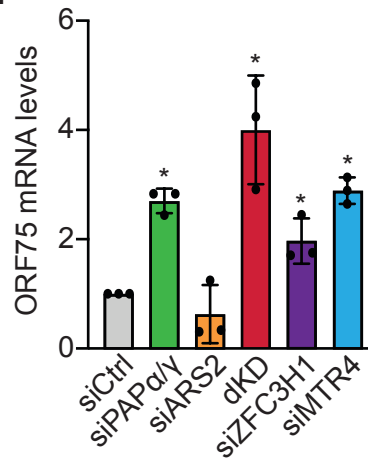

**F**

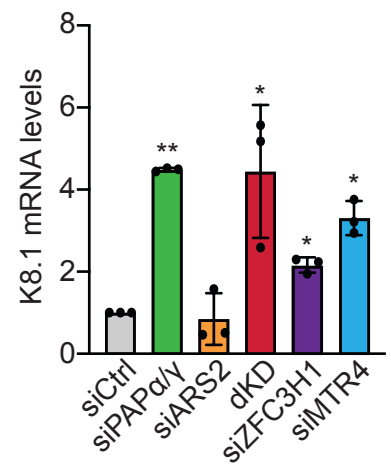

# Figure 4

bioRxiv preprint doi: <https://doi.org/10.1101/2020.02.18.955526>; this version posted February 20, 2020. The copyright holder for this preprint (which was not certified by peer review) is the author/funder, who has granted bioRxiv a license to display the preprint in perpetuity. It is made available under a [CC-BY-NC-ND 4.0 International license](https://creativecommons.org/licenses/by-nc-nd/4.0/).

**A**

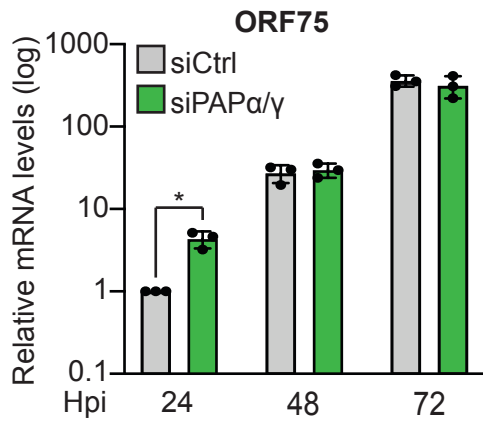

**B**

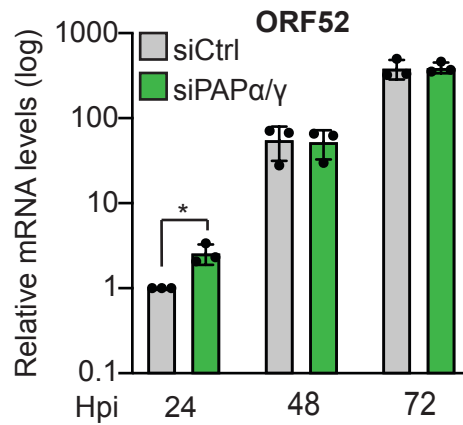

**C**

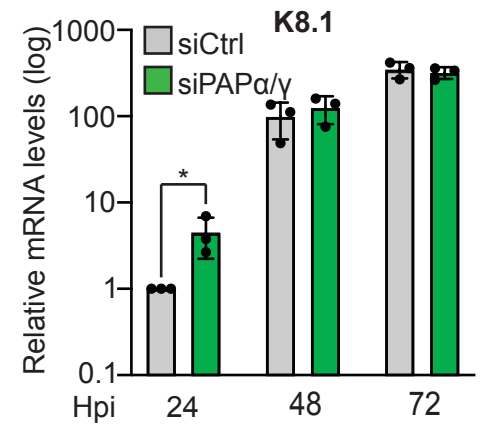

**D**

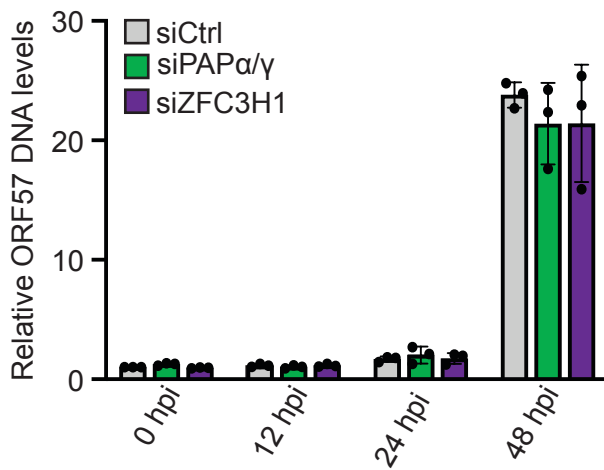

**E**

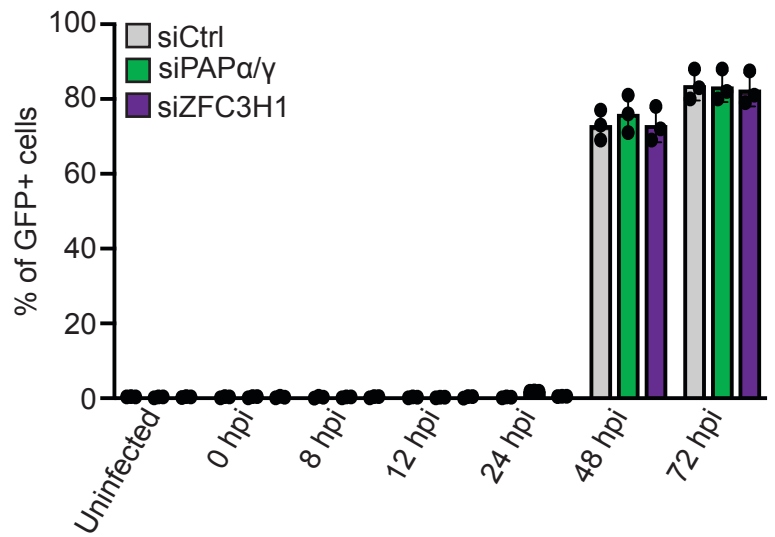

## Figure 5

bioRxiv preprint doi: <https://doi.org/10.1101/2020.02.18.955526>; this version posted February 20, 2020. The copyright holder for this preprint (which was not certified by peer review) is the author/funder, who has granted bioRxiv a license to display the preprint in perpetuity. It is made available under aCC-BY-NC-ND 4.0 International license.

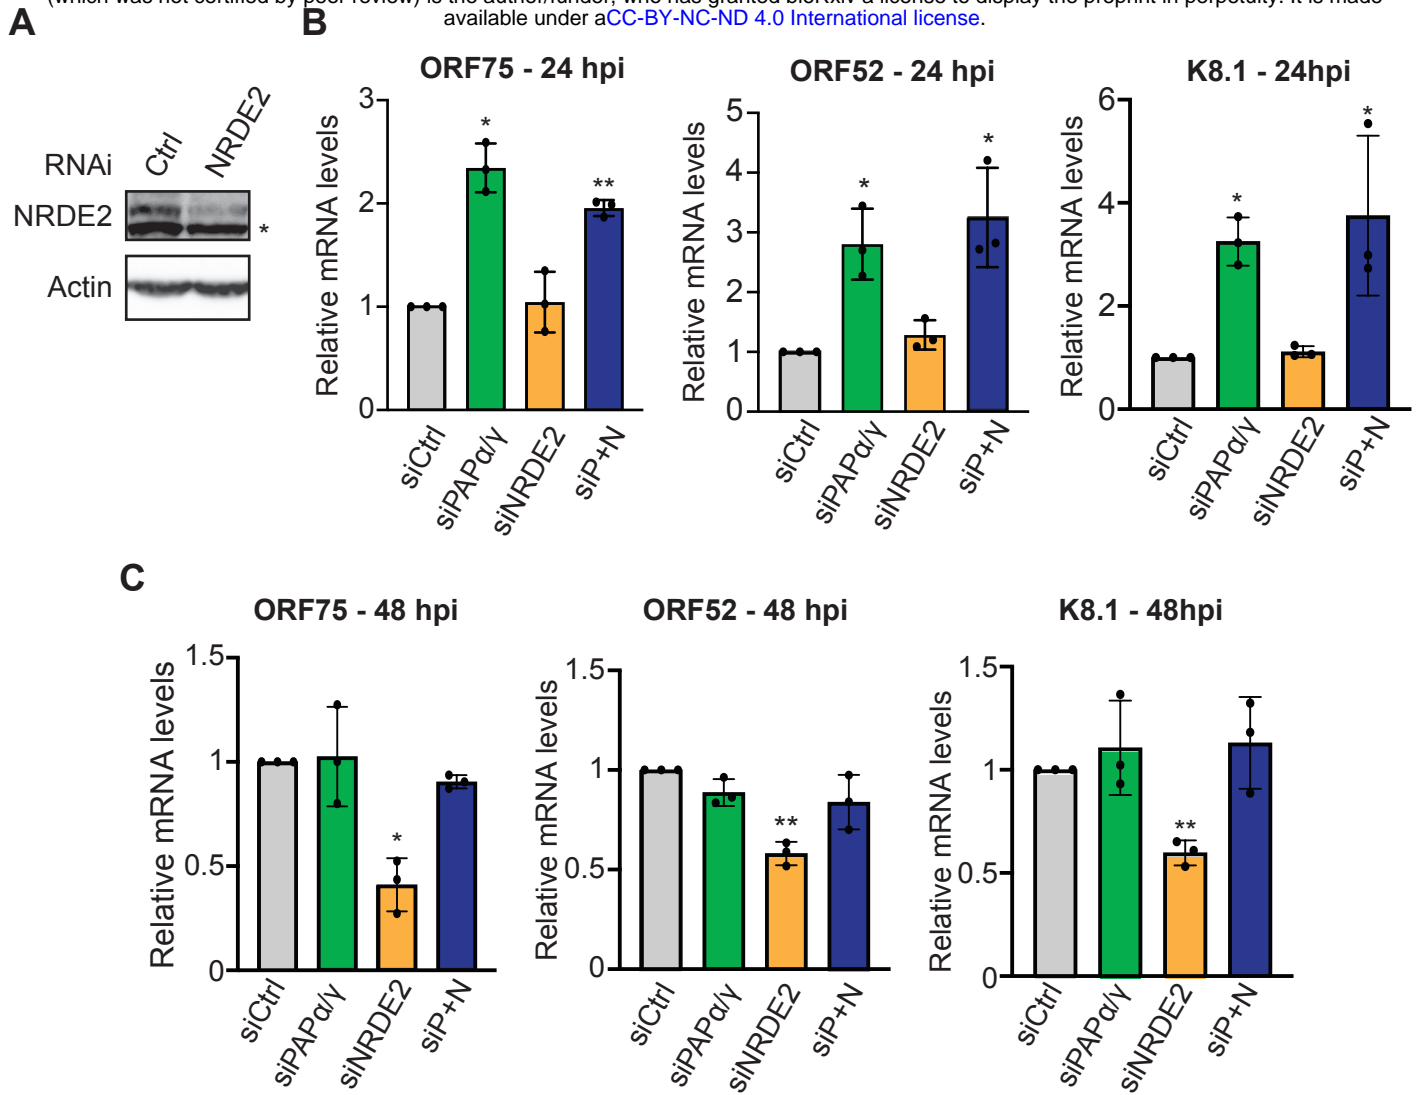

## Figure 6

A

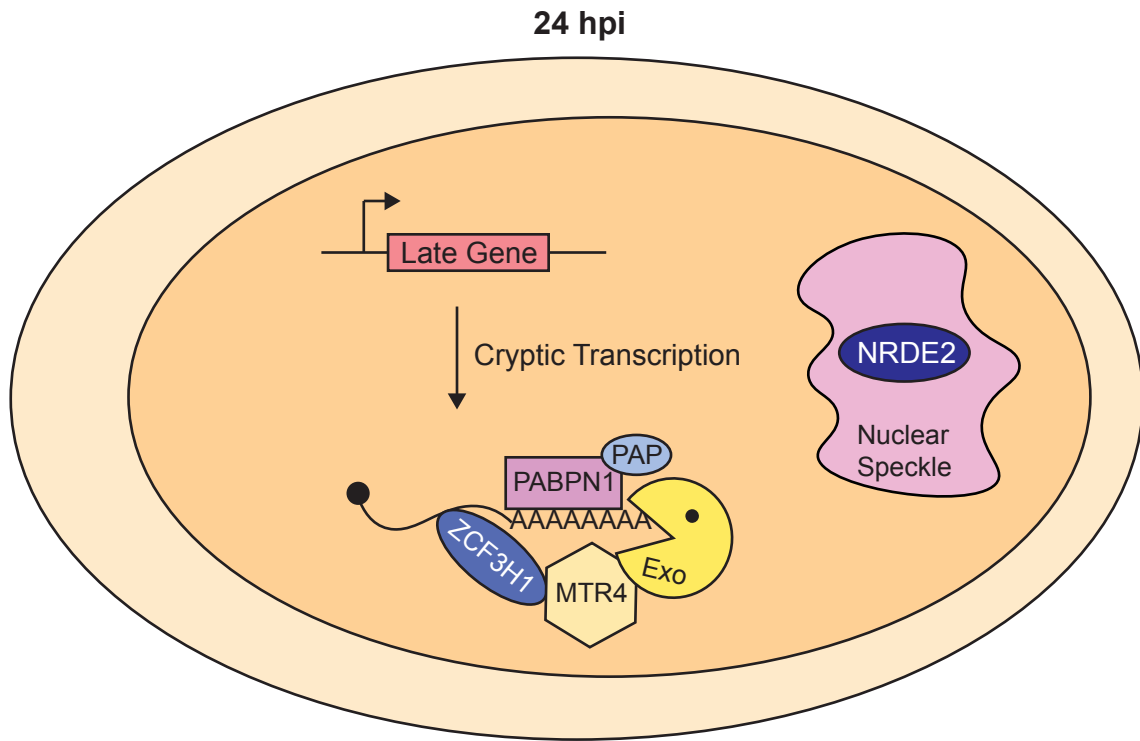

B

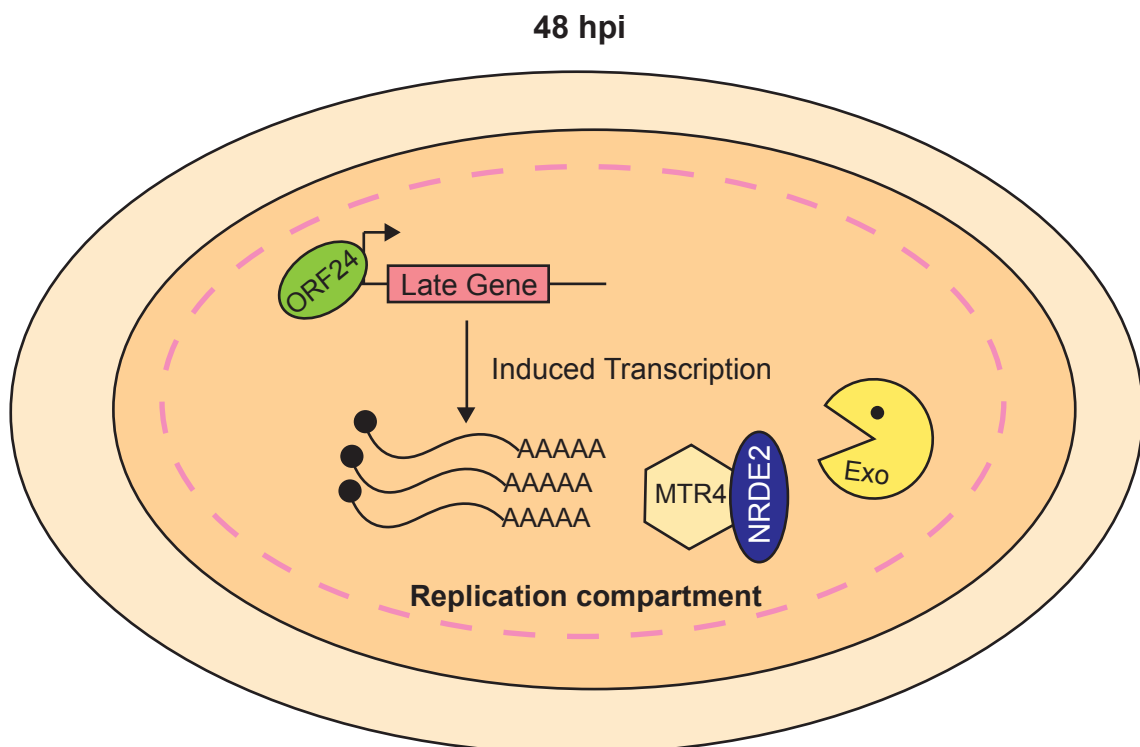

Source: https://www.biorxiv.org/content/10.1101/2020.02.18.955526v1.full.pdf
